# Supplementary material
Source: MDPI journal article supplement (https://www.mdpi.com/2073-4441/15/4/661)
Supplement: s1 [file s1]

**Table S1:** Surface lithology and ground permeability in catchments of the Lachotka, Przebędowo, and Miedzichowo Reservoirs.

| Surface Lithology                                              |       |      | Permeability of Deposits |       |        |
|----------------------------------------------------------------|-------|------|--------------------------|-------|--------|
| Lachotka Reservoir                                             |       |      |                          |       |        |
| Lithology                                                      | [km²] | [%]  | Class of Permeability    | [km²] | [%]    |
| glacial tills                                                  | 0.86  | 24%  | 1                        | 0.86  | 23.80% |
| peaty aggradate muds on sandy aggradate muds of valley floors  | 0.001 | 0.1% | 2                        | 0.001 | 0.07%  |
| sandy aggradate muds of valley floors                          | 0.23  | 6%   | 3                        | 0.23  | 6.39%  |
| sands, gravels, and deluvial loams                             | 0.19  | 5%   | 4                        | 1.70  | 46.93% |
| sands, gravels, and glacial boulders on glacial tills          | 1.51  | 42%  |                          |       |        |
| sands, gravels, and boulders of terminal moraines              | 0.08  | 2%   | 5                        | 0.18  | 5.08%  |
| sands, gravels, and glacial boulders                           | 0.10  | 3%   | 5                        |       |        |
| fluvioglacial sands and gravels                                | 0.43  | 12%  | 7                        | 0.64  | 17.73% |
| fluvioglacial sands and gravels (outwash plain)                | 0.21  | 6%   | 7                        |       |        |
| total                                                          | 3.62  | 100% | Total                    | 3.62  | 1      |
| Miedzichowo Reservoir                                          |       |      |                          |       |        |
| sandy aggradate muds of valley floors                          | 0.08  | 21%  | 3                        | 0.08  | 21%    |
| sands and silty sands, fluvial and fluvioglacial               | 0.18  | 46%  | 4                        | 0.32  | 79%    |
| sands and gravels of terminal moraines                         | 0.13  | 33%  | 5                        | 0.00  | 0%     |
| total                                                          | 0.40  | 100  | Total                    | 0.40  | 100    |
| Przebędowo Reservoir                                           |       |      |                          |       |        |
| glacial tills                                                  | 1.54  | 37%  | 1                        | 1.54  | 37%    |
| humic sands on fluvioglacial sands and gravels (outwash plain) | 0.03  | 1%   | 3                        | 2.15  | 52%    |
| dusty weathered sands (eluvial) on glacial tills               | 1.69  | 41%  |                          |       |        |
| deluvial sands and loams                                       | 0.26  | 6%   |                          |       |        |
| peats on sandy aggradate muds of valley floors                 | 0.03  | 1%   |                          |       |        |
| peats                                                          | 0.13  | 3%   | 4                        | 0.33  | 8%     |
| glacial sands on glacial tills                                 | 0.23  | 6%   |                          |       |        |
| humic sands                                                    | 0.08  | 2%   |                          |       |        |
| fluvioglacial sands and gravels on glacial tills               | 0.02  | 0%   |                          |       |        |
| sands and gravels of terminal moraines                         | 0.06  | 1%   | 5                        | 0.06  | 1%     |
| fluvioglacial sands and gravels                                | 0.07  | 2%   | 7                        | 0.07  | 2%     |
| total                                                          | 4.14  | 100% | Total                    | 4.14  | 100%   |
